# Supplementary material
Source: publisher figshare collection journal article supplement (https://sage.figshare.com/ndownloader/files/13868966)
Supplement: Supplementary file 1 [file 13868966]

## **Physical Activity in COPD: Minimal Clinically Important Difference for Medical Events**

Merilee A. Teylan<sup>1</sup>, Ana Kantorowski<sup>1</sup>, Diana Homsy<sup>1</sup>, Reema Kadri<sup>2</sup>, Caroline R. Richardson<sup>2</sup>, Marilyn L. Moy<sup>1,3</sup>

<sup>1</sup>Pulmonary and Critical Care Medicine Section, VA Boston Healthcare System, Boston, MA

<sup>2</sup>Department of Family Medicine, University of Michigan, Ann Arbor, MI

<sup>3</sup>Harvard Medical School, Boston, MA

## **SUPPLEMENT**

Table S.1. Baseline subject characteristics between those randomized and analyzed versus those randomized but not analyzed

| Characteristic                           | Total<br>N=114 | Analyzed<br>N=93 | Not Analyzed<br>N=21 | Between<br>Group<br>P-Value* |
|------------------------------------------|----------------|------------------|----------------------|------------------------------|
| Age (years)                              | 69 ± 8         | 69 ± 8           | 66 ± 9               | 0.07                         |
| Male sex                                 | 112 (98.3)     | 91 (97.9)        | 21 (100)             | 1.0 <sup>†</sup>             |
| Race (White)                             | 105 (92.1)     | 85 (91.4)        | 20 (95.2)            | 1.0 <sup>†</sup>             |
| BMI (kg/m <sup>2</sup> )                 | 29 ± 5.5       | 29 ± 5.3         | 30 ± 6.2             | 0.26                         |
| Pack-years                               | 60.8 ± 40.8    | 61.5 ± 40.9      | 57.8 ± 41.3          | 0.42 <sup>‡</sup>            |
| Current smoker                           | 43 (37.7)      | 33 (35.5)        | 10 (47.6)            | 0.30                         |
| Current oxygen use                       | 26 (22.8)      | 22 (23.7)        | 4 (19.1)             | 0.78 <sup>†</sup>            |
| Prior pulmonary rehabilitation           | 13 (11.4)      | 11 (11.8)        | 2 (9.5)              | 1.0 <sup>†</sup>             |
| Baseline daily step count                | 3444 ± 2444    | 3127 ± 1830      | 4845 ± 3974          | 0.12 <sup>‡</sup>            |
| FEV <sub>1</sub> (L)                     | 1.86 ± 0.61    | 1.86 ± 0.6       | 1.86 ± 0.5           | 0.74 <sup>‡</sup>            |
| FEV <sub>1</sub> % predicted             | 62.4 ± 21.2    | 62.7 ± 22.3      | 61.3 ± 15.5          | 0.87 <sup>‡</sup>            |
| GOLD stage                               |                |                  |                      | 0.45 <sup>†</sup>            |
| I                                        | 20 (17.5)      | 18 (19.3)        | 2 (9.5)              |                              |
| II                                       | 65 (57.0)      | 50 (53.8)        | 15 (71.4)            |                              |
| III                                      | 23 (20.2)      | 19 (20.4)        | 4 (19.1)             |                              |
| IV                                       | 6 (5.3)        | 6 (6.5)          | 0 (0)                |                              |
| Comorbidities                            |                |                  |                      |                              |
| CAD                                      | 23 (20.2)      | 19 (20.4)        | 4 (19.1)             | 1.0 <sup>†</sup>             |
| Hypertension                             | 67 (58.8)      | 51 (54.8)        | 16 (76.2)            | 0.09 <sup>†</sup>            |
| CHF                                      | 8 (7.0)        | 5 (5.4)          | 3 (14.3)             | 0.16 <sup>†</sup>            |
| Arthritis                                | 42 (36.8)      | 36 (38.7)        | 6 (28.6)             | 0.46 <sup>†</sup>            |
| Diabetes                                 | 29 (25.4)      | 22 (23.7)        | 7 (33.3)             | 0.41 <sup>†</sup>            |
| Depression                               | 44 (38.6)      | 34 (36.6)        | 10 (47.6)            | 0.46 <sup>†</sup>            |
| Back Pain                                | 45 (39.5)      | 38 (40.9)        | 7 (33.3)             | 0.62 <sup>†</sup>            |
| 6MWT distance (m)                        | 389 ± 83       | 390 ± 82         | 385 ± 92             | 0.80                         |
| SGRQ-TS                                  | 34 ± 17        | 34 ± 16          | 34 ± 19              | 0.92                         |
| MMRC dyspnea score                       |                |                  |                      | 0.40 <sup>†</sup>            |
| 0-2                                      | 88 (77.2)      | 70 (75.3)        | 18 (85.7)            |                              |
| 3-4                                      | 26 (22.8)      | 23 (24.7)        | 3 (14.3)             |                              |
| BDI-II depression score                  | 9.2 ± 9.2      | 8.9 ± 9.3        | 10.6 ± 8.8           | 0.30 <sup>‡</sup>            |
| AE in the past year                      | 16 (14.0)      | 15 (16.1)        | 1 (4.8)              | 0.30 <sup>†</sup>            |
| Hospitalized for any reason in past year | 14 (12.3)      | 10 (10.8)        | 4 (19.1)             | 0.29 <sup>†</sup>            |

Values are means ± SD or frequency (percentages)

BMI denotes body-mass index; FEV<sub>1</sub> forced expiratory volume in first second; GOLD global strategy for the diagnosis, management, and prevention of chronic obstructive pulmonary disease; CAD coronary artery disease; CHF congestive heart failure; 6MWT 6-minute walk test; SGRQ-TS St. George's Respiratory Questionnaire-Total Score; MMRC Modified Medical Research Council; and AE acute exacerbation

\*Unpaired t-test for continuous and chi-square test for categorical variables, unless otherwise noted. <sup>†</sup>Fisher's exact test. <sup>‡</sup>Wilcoxon rank-sum test

Table S.2. Baseline subject characteristics by study randomization arm

| Characteristic                           | Total<br>N=93 | Pedometer<br>Alone<br>N=43 | Pedometer<br>Plus Website<br>N=50 | Between<br>Group<br>P-Value* |
|------------------------------------------|---------------|----------------------------|-----------------------------------|------------------------------|
| Age (years)                              | 69 ± 8        | 69.3 ± 8                   | 69 ± 9                            | 0.97                         |
| Male sex                                 | 91 (97.9)     | 42 (97.7)                  | 49 (98.0)                         | 1.0 <sup>†</sup>             |
| Race (White)                             | 85 (91.4)     | 39 (90.7)                  | 46 (92.0)                         | 1.0 <sup>†</sup>             |
| BMI (kg/m <sup>2</sup> )                 | 29 ± 5.3      | 28.6 ± 5.3                 | 29.4 ± 5.4                        | 0.50                         |
| Pack-years                               | 61.5 ± 40.9   | 61.2 ± 47.5                | 61.8 ± 34.7                       | 0.38 <sup>‡</sup>            |
| Current smoker                           | 33 (35.5)     | 15 (34.9)                  | 18 (36.0)                         | 0.91                         |
| Current oxygen use                       | 22 (23.7)     | 9 (20.9)                   | 13 (26.0)                         | 0.57                         |
| Prior pulmonary rehabilitation           | 11 (11.8)     | 5 (11.6)                   | 6 (12.0)                          | 1.0 <sup>†</sup>             |
| Baseline daily step count                | 3127 ± 1830   | 3506 ± 1992                | 2801 ± 1630                       | 0.11 <sup>‡</sup>            |
| FEV <sub>1</sub> (L)                     | 1.86 ± 0.6    | 1.92 ± 0.70                | 1.81 ± 0.60                       | 0.49 <sup>‡</sup>            |
| FEV <sub>1</sub> % predicted             | 62.7 ± 22.3   | 64.9 ± 22.3                | 60.8 ± 22.3                       | 0.25 <sup>‡</sup>            |
| GOLD stage                               |               |                            |                                   | 0.79 <sup>†</sup>            |
| I                                        | 18 (19.3)     | 10 (23.3)                  | 8 (16.0)                          |                              |
| II                                       | 50 (53.8)     | 22 (51.1)                  | 28 (56.0)                         |                              |
| III                                      | 19 (20.4)     | 9 (20.9)                   | 10 (20.0)                         |                              |
| IV                                       | 6 (6.5)       | 2 (4.7)                    | 4 (8.0)                           |                              |
| Comorbidities                            |               |                            |                                   |                              |
| CAD                                      | 19 (20.4)     | 10 (23.3)                  | 9 (18.0)                          | 0.53                         |
| Hypertension                             | 51 (54.8)     | 21 (48.8)                  | 30 (60.0)                         | 0.28                         |
| CHF                                      | 5 (5.4)       | 3 (7.0)                    | 2 (4.0)                           | 0.66 <sup>†</sup>            |
| Arthritis                                | 36 (38.7)     | 20 (46.5)                  | 16 (32.0)                         | 0.15                         |
| Diabetes                                 | 22 (23.7)     | 7 (16.3)                   | 15 (30.0)                         | 0.12                         |
| Depression                               | 34 (36.6)     | 14 (32.6)                  | 20 (40.0)                         | 0.46                         |
| Back Pain                                | 38 (40.9)     | 20 (46.5)                  | 18 (36.0)                         | 0.30                         |
| 6MWT distance (m)                        | 390 ± 82      | 394 ± 72                   | 387 ± 89                          | 0.67                         |
| SGRQ-TS                                  | 34 ± 16       | 33 ± 15                    | 35 ± 17                           | 0.46                         |
| MMRC dyspnea score                       |               |                            |                                   | 0.76                         |
| 0-2                                      | 70 (75.3)     | 33 (76.7)                  | 10 (23.3)                         |                              |
| 3-4                                      | 23 (24.7)     | 37 (74.0)                  | 13 (26.0)                         |                              |
| BDI-II depression score                  | 8.9 ± 9.3     | 9.1 ± 9.4                  | 8.8 ± 9.4                         | 0.84 <sup>‡</sup>            |
| AE in the past year                      | 15 (16.1)     | 7 (16.3)                   | 8 (16.0)                          | 1.0 <sup>†</sup>             |
| Hospitalized for any reason in past year | 10 (10.8)     | 3 (7.0)                    | 7 (14.0)                          | 0.33 <sup>†</sup>            |

Values are means ± SD or frequency (percentages)

BMI denotes body-mass index; FEV<sub>1</sub> forced expiratory volume in first second; GOLD global strategy for the diagnosis, management, and prevention of chronic obstructive pulmonary disease; CAD coronary artery disease; CHF congestive heart failure; 6MWT 6-minute walk test; SGRQ-TS St. George's Respiratory Questionnaire-Total Score; MMRC Modified Medical Research Council; and AE acute exacerbation

\*Unpaired t-test for continuous and chi-square test for categorical variables, unless otherwise noted. <sup>†</sup>Fisher's exact test. <sup>‡</sup>Wilcoxon rank-sum test

Semi-Structured Telephone Interview Script

**Monthly Adverse Events Survey**

- 1. In the past 4 weeks, have you had any worsening of your breathing?**

YES              NO

Notes:

- 2. In the past 4 weeks, have you taken any new medications for your breathing?**

YES              NO

Notes:

- 3. In the past 4 weeks, have you sought care from your medical provider, in an Emergency Room or Urgent Care center, for any reason?**

YES              NO

Notes:

- 4. In the past 4 weeks, have you been hospitalized with an overnight stay for any reason?**

YES              NO

Notes:

5. In the past 4 weeks, have you had any of the following symptoms become **NEW** or **WORSE** for you?

|                                 |        |        |
|---------------------------------|--------|--------|
|                                 |        | Notes: |
| <b>Shortness of breath</b>      | YES NO |        |
| <b>Chest pain or discomfort</b> | YES NO |        |
| <b>Lightheadedness</b>          | YES NO |        |
| <b>Dizziness</b>                | YES NO |        |
| <b>Leg pain</b>                 | YES NO |        |
| <b>Foot pain</b>                | YES NO |        |
| <b>Back pain</b>                | YES NO |        |
